# Supplementary material
Source: publisher figshare collection journal article supplement (https://acs.figshare.com/ndownloader/files/7788610)
Supplement: Supplementary file 1 [file 7788610]

**Supplementary Information**

**Highly efficient white-light emission and UV-visible/NIR  
luminescence sensing of lanthanide metal-organic frameworks**

Xinyu Wang, Pengfei Yan, Yuxin Li, Guanghui An, Xu Yao and Guangming Li\*

Key Laboratory of Functional Inorganic Material Chemistry (MOE), School of Chemistry and  
Materials Science, Heilongjiang University, No. 74, Xuefu Road, Nangang District, Harbin  
150080, People's Republic of China

**Characterization.** The FT-IR spectra of complexes **1–10** exhibit similar patterns (Figure S1). In a typical spectrum of complex **1**, the broad band around  $3471\text{ cm}^{-1}$  is attributed to the characteristic peak of O–H bonds from the solvent molecules in the complex. The asymmetric and symmetric stretching vibrations of carboxylate groups are observed at  $1647$ ,  $1596$ , and  $1393\text{ cm}^{-1}$ . The appearance of the characteristic band at  $1647\text{ cm}^{-1}$  indicates the deprotonation of the carboxylate groups and coordination to the lanthanide ions. UV-vis absorption spectra of the  $\text{H}_4\text{L}$  and complexes **1–10** were conducted in methanol solution and exhibit a similar pattern (Figure S2). The main absorption bands at  $217\text{ nm}$  is attributed to the  $\pi\text{--}\pi^*$  transitions of the benzene rings. TG analyses support that there are crystalline solvents in complexes **1–10** (Figure S3). For example, complex **1** exhibits a gradual weight loss of  $1.3\%$  in the temperature range of  $30\text{--}180\text{ }^\circ\text{C}$ , which corresponds to the loss of solvent molecules in complex **1** (calculated  $1.5\%$ ). Other calculations for crystalline solvents in complexes **2–10** are shown in Figure S3. Powder X-ray diffraction (PXRD) analysis demonstrates that the crystal structures of complexes **1–10** are in agreement with the simulated patterns, clearly indicating that the pure phases were obtained (Figure S4).

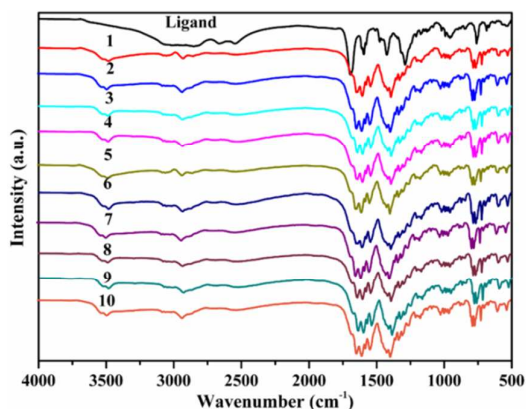

**Figure S1.** Infrared spectra of  $\text{H}_4\text{L}$  and complexes **1–10**.

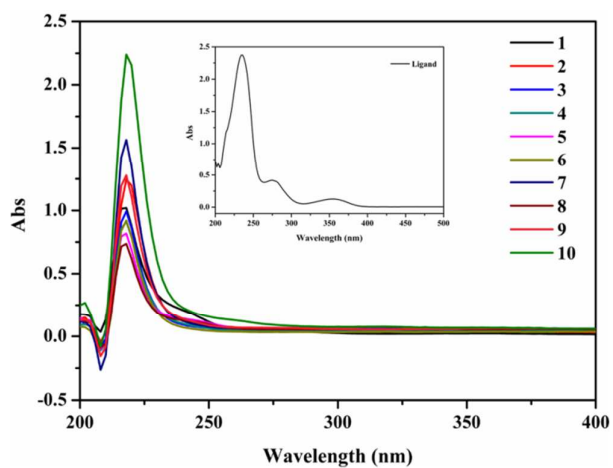

**Figure S2.** Ultraviolet spectra of  $H_4L$  and complexes **1–10**.

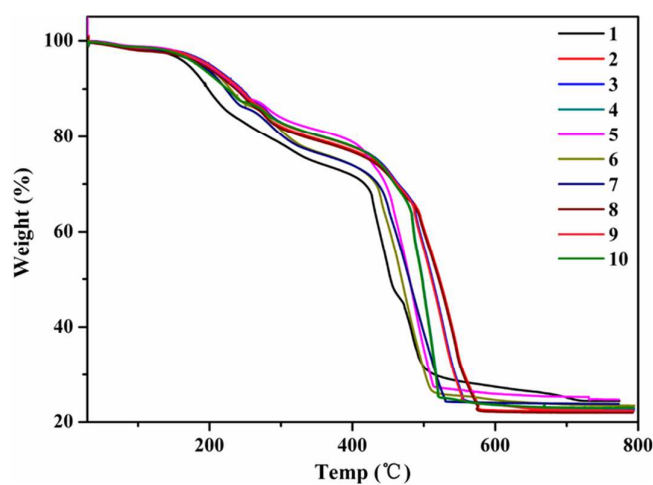

**Figure S3.** TG curves of complexes **1–10**.

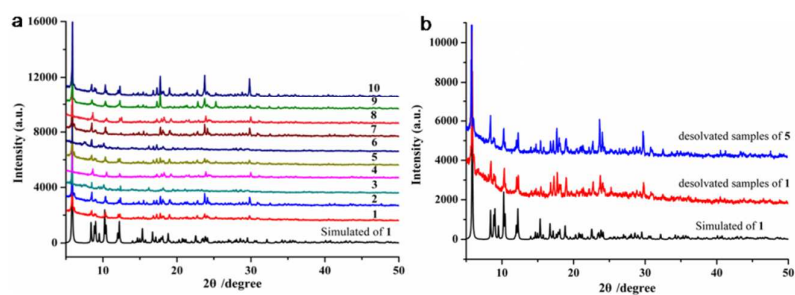

**Figure S4.** (a) PXRD patterns of complex **1** simulated from the X-ray single-crystal structure and as-synthesized samples of complexes **1–10**. (b) PXRD patterns of complex **1** simulated from the X-ray single-crystal structure and desolvated samples of complexes **1** and **5**.

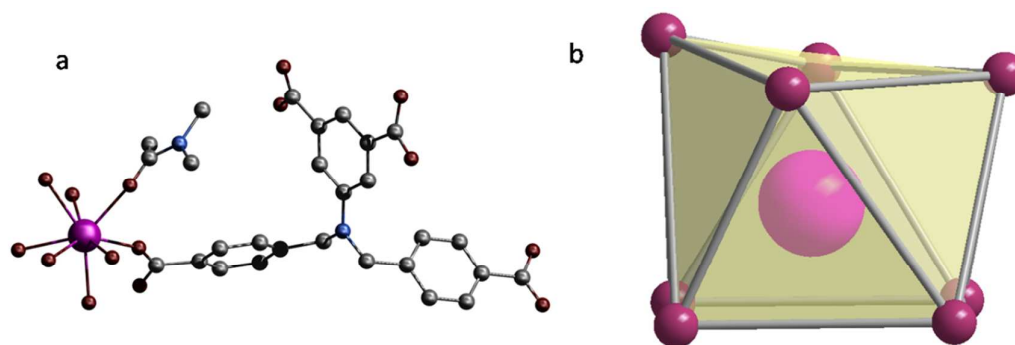

**Figure S5.** (a) The asymmetric unit of complex **5**. All hydrogen atoms and solvent molecules are omitted. (b) Coordination polyhedrons of  $\text{Eu}^{3+}$  ions.

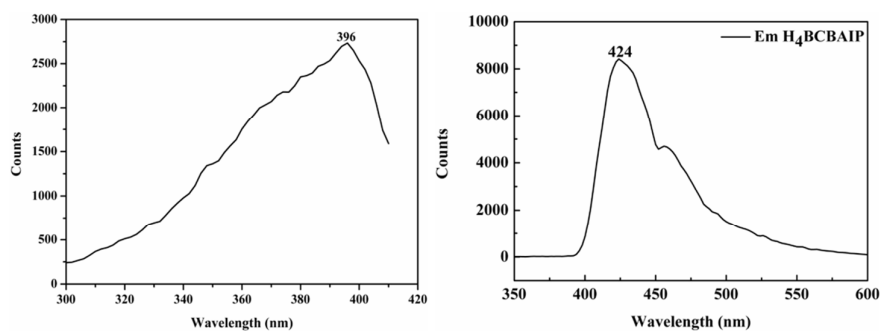

**Figure S6.** Solid state excitation (left) and emission (right) spectra of free  $\text{H}_4\text{L}$  ligand.

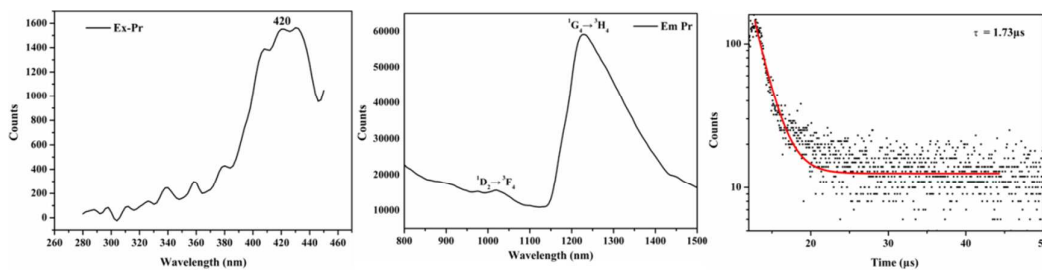

**Figure S7.** Solid state excitation, emission spectra and Room-temperature luminescence decay curves of complex **2**.

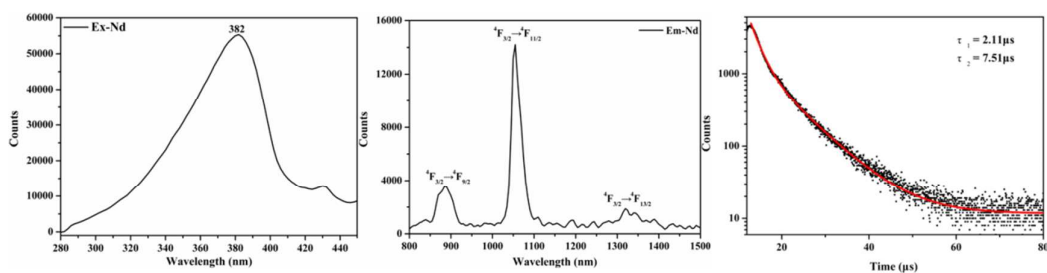

**Figure S8.** Solid state excitation, emission spectra and Room-temperature luminescence decay curves of complex **3**.

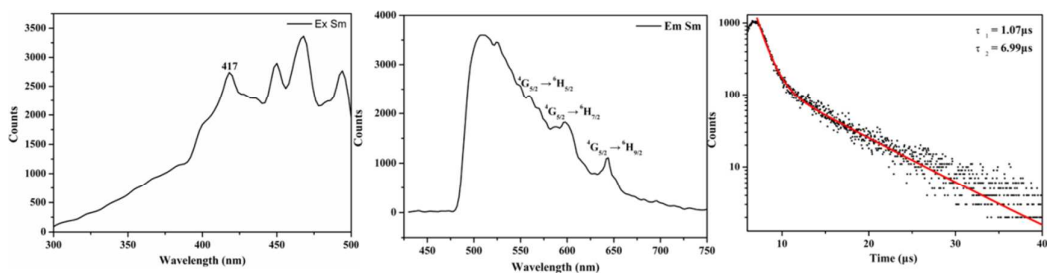

**Figure S9.** Solid state excitation, emission spectra and Room-temperature luminescence decay curves of complex **4**.

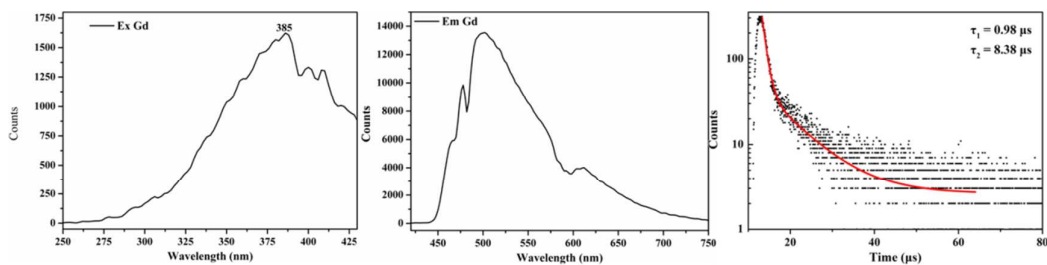

**Figure S10.** Solid state excitation, emission spectra and Room-temperature luminescence decay curves of complex **6**.

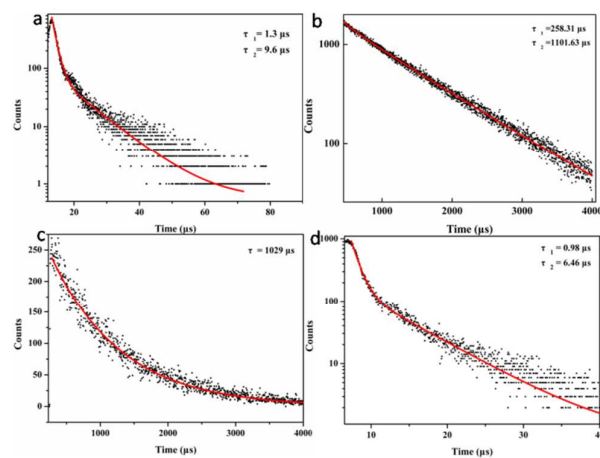

**Figure S11.** Room-temperature luminescence decay curves of complexes **1** (a), **5** (b), **7** (c) and **8** (d).

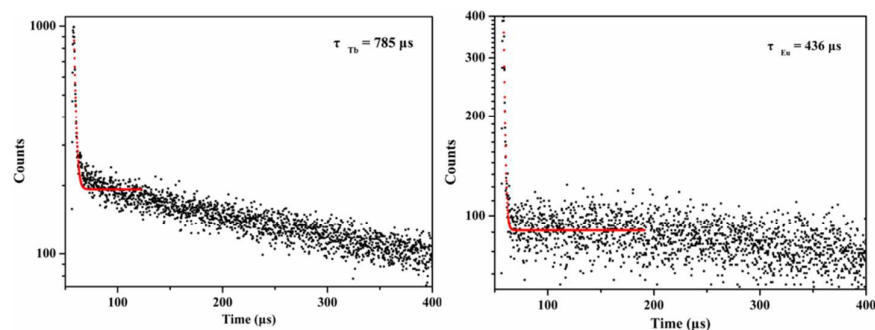

**Figure S12.** Room-temperature luminescence decay curves of complex **9** (monitored at 542 and 614 nm).

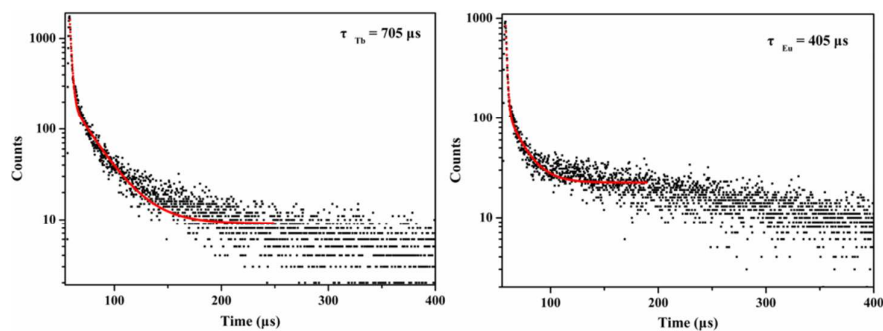

**Figure S13.** Room-temperature luminescence decay curves of complex **10** (monitored at 542 and 614 nm).

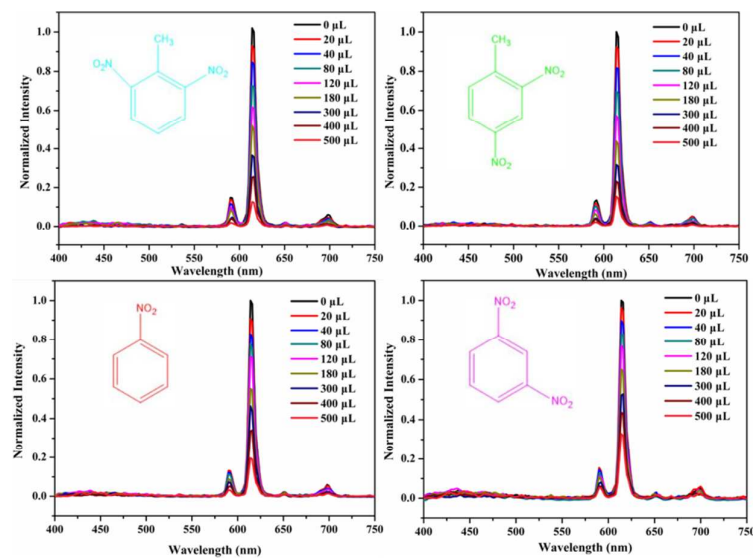

**Figure S14.** The fluorescence spectrum of complex **5** dispersed in DMAC with the addition of different content of nitro aromatic compounds at excitation 382 nm.

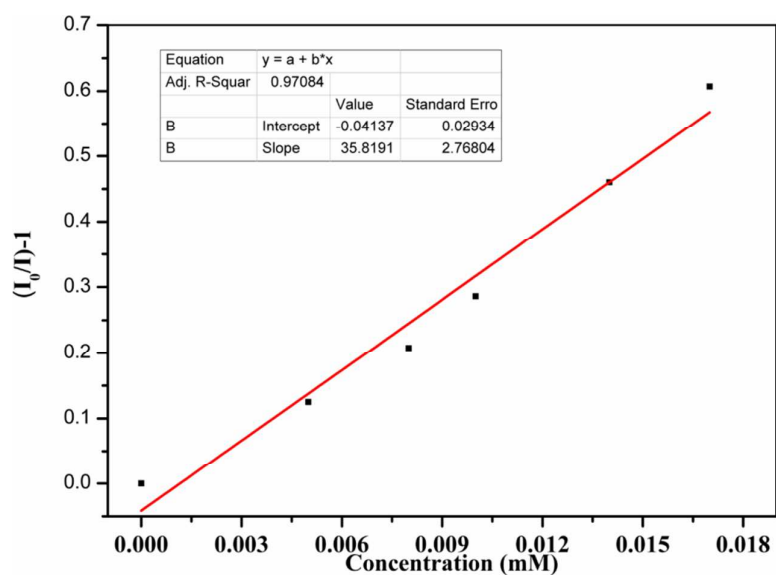

**Figure S15.** The Stern-Volmer plots for complex **5** with TNP in the low concentration region. The solid lines represent fits to the concentration-resolved data using the Stern-Volmer equation.

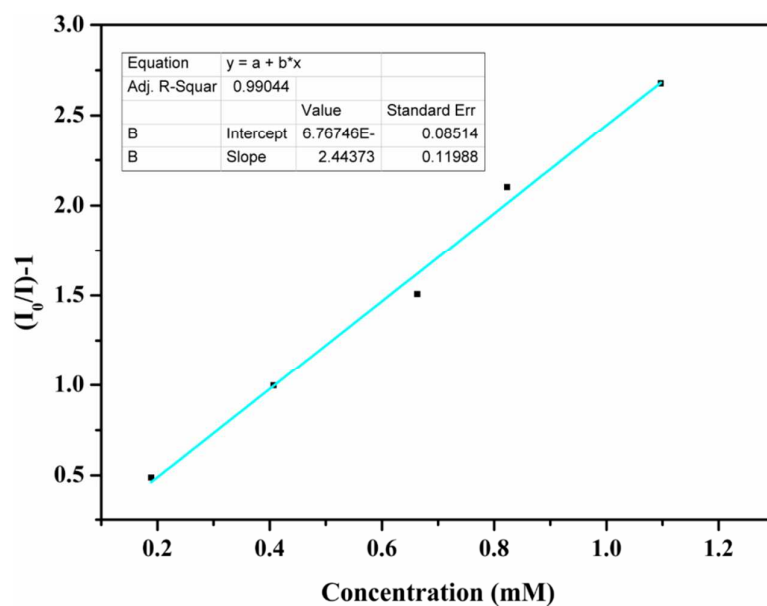

**Figure S16.** The Stern-Volmer plots for complex **5** with 2,6-DNT in the low concentration region. The solid lines represent fits to the concentration-resolved data using the Stern-Volmer equation.

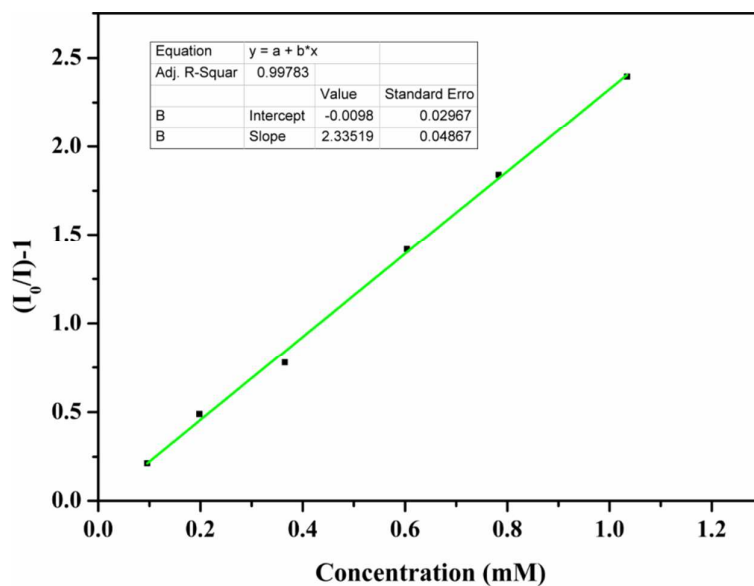

**Figure S17.** The Stern-Volmer plots for complex **5** with 2,4-DNT in the low concentration region. The solid lines represent fits to the concentration-resolved data using the Stern-Volmer equation.

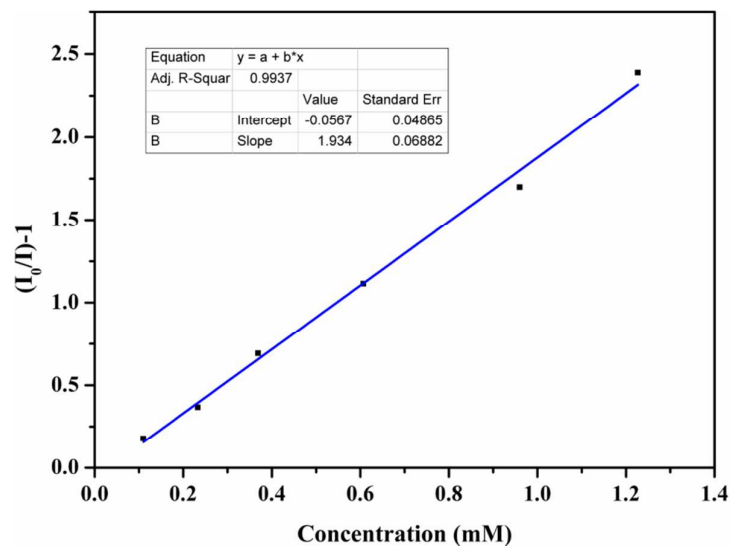

**Figure S18.** The Stern-Volmer plots for complex **5** with NB in the low concentration region. The solid lines represent fits to the concentration-resolved data using the Stern-Volmer equation.



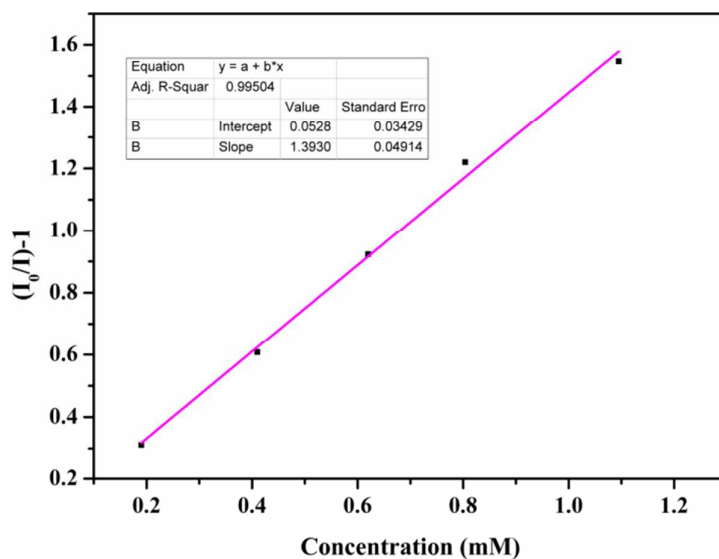

**Figure S19.** The Stern-Volmer plots for complex **5** with m-DNB in the low concentration region. The solid lines represent fits to the concentration-resolved data using the Stern-Volmer equation.

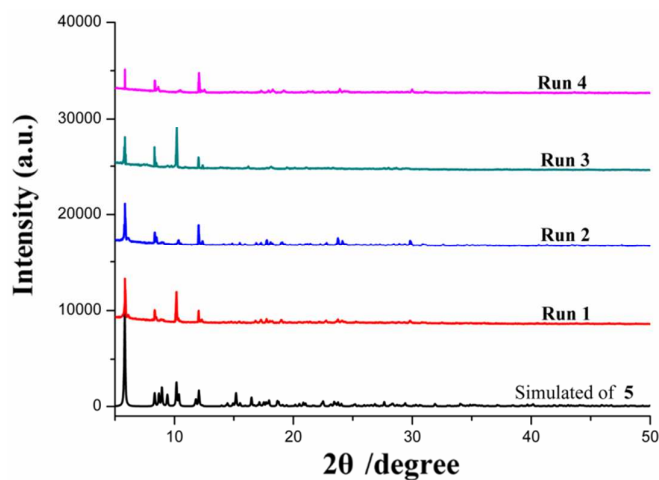

**Figure S120.** PXRD patterns of complex**5** after detection of TNP in DMACfor four cycles.

**Table S1.** Standard Deviation ( $\sigma$ ) calculation for the detection of TNP for complex **5**.

| Test                            | Fluorescence intensity (nm) |
|---------------------------------|-----------------------------|
| 1                               | 1760.06                     |
| 2                               | 1769.17                     |
| 3                               | 1753.79                     |
| 4                               | 1758.47                     |
| 5                               | 1764.55                     |
| Averagr                         | 1761.21                     |
| Standard Deviation ( $\sigma$ ) | 5.57                        |

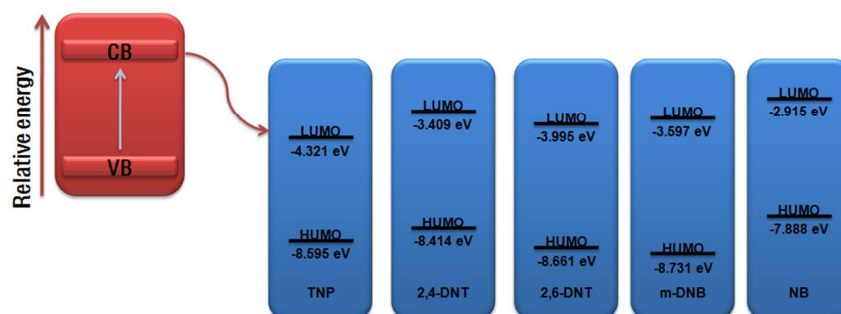

**Figure S21.** Schematic illustration of electron transfer process between complex **5** and NACs

**Table S2.** HOMO and LUMO energies of some nitro aromatic compounds.<sup>1</sup>

| Analytes | HOMO (ev) | LUMO (ev) | Band Gap (ev) |
|----------|-----------|-----------|---------------|
| TNP      | -8.595    | -4.321    | 4.274         |
| 2,6-DNP  | -8.661    | -3.995    | 4.666         |
| 2,4-DNP  | -8.414    | -3.409    | 5.005         |
| NB       | -8.731    | -3.597    | 5.134         |
| m-DNB    | -7.888    | -2.915    | 4.973         |

**Table S3.** Selected  $K_{sv}$  for TNP for complex **5** and other materials.<sup>2-7</sup>

| Material                                                                                    | Detection | $K_{sv}$ ( $M^{-1}$ ) | Ref.      |
|---------------------------------------------------------------------------------------------|-----------|-----------------------|-----------|
| UiO-67@N                                                                                    | TNP       | $2.9 \times 10^4$     | 2         |
| Zn-POA                                                                                      | TNP       | $4.5 \times 10^4$     | 3         |
| [Cd(NDC) <sub>0.5</sub> (PCA)]                                                              | TNP       | $3.5 \times 10^4$     | 4         |
| JUC-135                                                                                     | TNP       | $3.7 \times 10^4$     | 5         |
| Tb(1,3,5-BTC)                                                                               | TNP       | $3.42 \times 10^4$    | 6         |
| [Eu <sub>3</sub> (bpybd) <sub>3</sub> (HCOO)( $\mu_3$ -OH) <sub>2</sub> (H <sub>2</sub> O)] | TNP       | $2.1 \times 10^4$     | 7         |
| Complex <b>5</b>                                                                            | TNP       | $3.58 \times 10^4$    | This work |

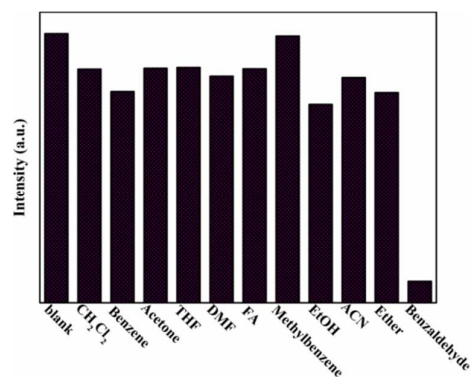

**Figure S22.** The luminescent intensities ( $^4F_{3/2} \rightarrow ^4F_{11/2}$ ) of complex **3** in suspension excited at 370 nm affected by various solvents.

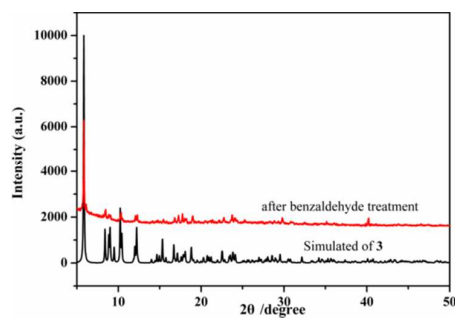

**Figure S23.** PXRD spectrum of the complex **3** before and after benzaldehyde treatment

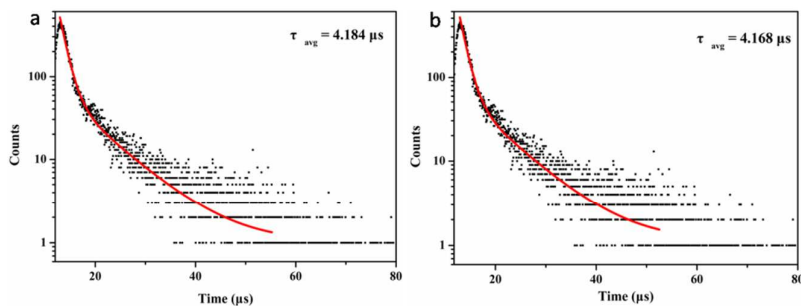

**Figure S24.** Room-temperature luminescence decay curves for complex **3** in the absence (a) and presence (b) of benzaldehyde (DMAC, 10 mM, 20  $\mu$ L and  $\lambda_{ex}$  = 370 nm).

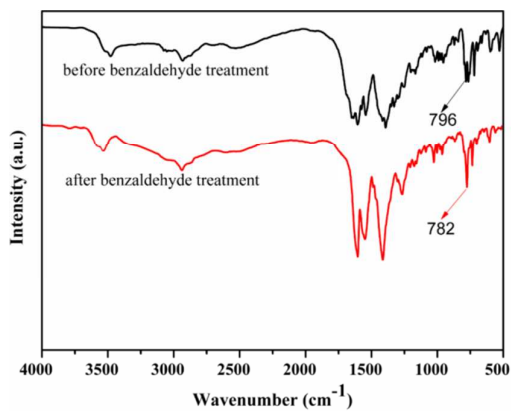

**Figure S25.** FT-IR spectra of Complex **3** before and after treatment with benzaldehyde

## Reference:

- (1) Hu, Z.; Deibert, B. J.; Li, J. *Chem. Soc. rev.* **2014**, 43, 5815-40.
- (2) Nagarkar, S. S.; Desai, A. V. and Ghosh, S. K. *Chem. Commun.* **2014**, 50, 8915–8918.
- (3) Jiang, X.; Liu, Y.; Wu, P.; Wang, L.; Wang, Q.; Zhu, G.; Li, X. L. *RSC. Adv.* **2014**, 4, 47357-47360.
- (4) Nagarkar, S. S.; Joarder, B.; Chaudhari, A. K.; Mukherjee, S. and Ghosh, S. K. *Angew. Chem., Int. Ed.* **2013**, 52, 2881–2885.
- (5) He, H. M.; Song, Y.; Sun, F. X.; Bian, Z.; Gao, L. X. and Zhu, G. S. *J. Mater. Chem. A* **2015**, 3, 16598-16603.
- (6) Xiao, J. D.; Qiu, L. G.; Ke, F.; Yuan, Y. P.; Xu, G. S.; Wang, Y. M. and Jiang, X. *J. Mater. Chem. A* **2013**, 1, 8745–8752.
- (7) Song, X.Z.; Song, S.Y.; Zhao, S.N.; Hao, Z.M.; Zhu, M.; Meng, X.; Wu, L.L. and Zhang, H. J., *Adv. Funct. Mater.* **2014**, 24, 4034-4041.
